# Supplementary material for: Structural and kinetic investigation of the hydride composite Ca(BH4)2 + MgH2 system doped with NbF5 for solid-state hydrogen storage
Source: Royal Society of Chemistry journal article supplement (doi:10.1039/c5cp03557k), 2015-01-01
Supplement: c5cp03557k1.pdf [file c5cp03557k1.pdf]

## Electronic Supplementary Information

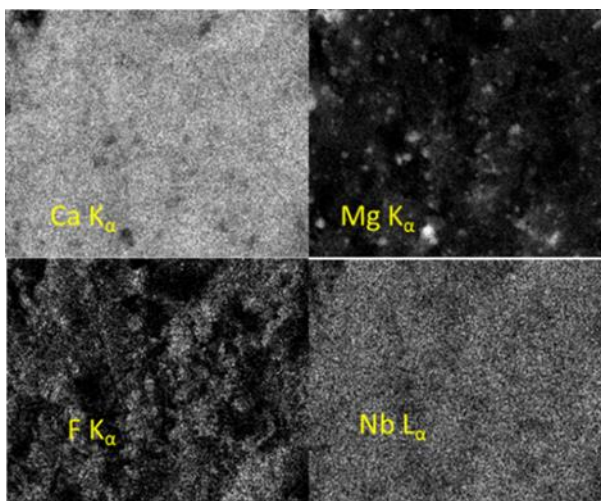

**Figure S1.** Elemental maps obtained by EDS for the NbF<sub>5</sub> doped Ca-RHC sample after desorption.

---

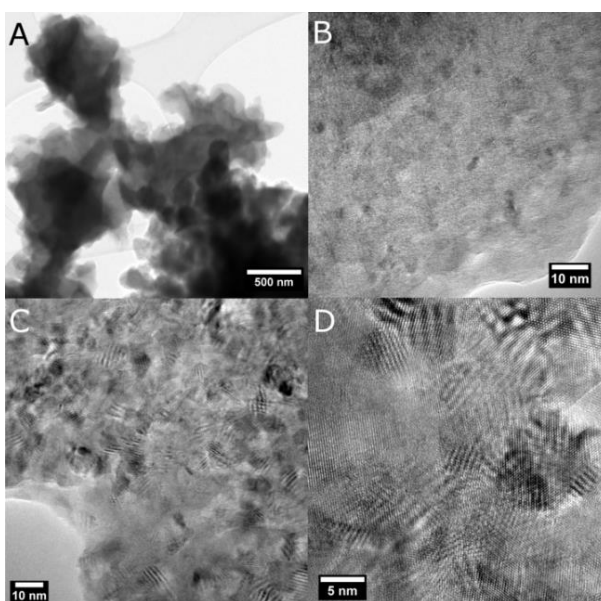

**Figure S2.** TEM micrographs of Ca-RHC after the first desorption displaying A) large aggregates of smaller particles, B) multiphase regions of low crystallinity C) and D) multiphase region of high crystallinity.

---
